# Supplementary material for: Association between Late-Eating Pattern and Higher Consumption of Ultra-Processed Food among Italian Adults: Findings from the INHES Study
Source: MDPI journal article supplement (doi:10.3390/nu15061497), 2023-03-20
Supplement: s1 [file s1]

Supplementary Materials

# A Late Eating Pattern is Associated with Higher Consumption of Ultra-processed Food among Italian Adults from the INHES Study

Marialaura Bonaccio <sup>1,\*</sup>, Emilia Ruggiero <sup>1</sup>, Augusto Di Castelnuovo <sup>2</sup>, Claudia Francisca Martínez <sup>1</sup>, Simona Esposito <sup>1</sup>, Simona Costanzo <sup>1</sup>, Chiara Cerletti <sup>1</sup>, Maria Benedetta Donati <sup>1</sup>, Giovanni de Gaetano <sup>1</sup> and Licia Iacoviello <sup>1,3</sup> for the INHES Study Investigators <sup>†</sup>

**Table S1.** Association of food processing according to NOVA classification with meal timing pattern across age groups from the INHES Study, Italy 2010–2013.

| NOVA groups                        | Meal timing pattern (Late vs. early eaters) |                                 |                                 | P value for interaction |
|------------------------------------|---------------------------------------------|---------------------------------|---------------------------------|-------------------------|
|                                    | Aged 19–50 y<br>(n=2967; 34.2%)             | Aged 51–65 y<br>(n=2863; 32.9%) | Aged 66–97 y<br>(n=2858; 32.9%) |                         |
|                                    | $\beta$ (95%CI)                             | $\beta$ (95%CI)                 | $\beta$ (95%CI)                 |                         |
| Minimally processed food (Group 1) | -0.17 (-0.24 to -0.10)                      | -0.09 (-0.16 to -0.02)          | 0.01 (-0.08 to 0.09)            | 0.0074                  |
| Culinary ingredients (Group 2)     | 0.01 (-0.07 to 0.08)                        | 0.04 (-0.04 to 0.12)            | 0.12 (0.03 to 0.21)             | 0.094                   |
| Processed food (Group 3)           | 0.10 (0.03 to 0.16)                         | -0.01 (-0.09 to 0.06)           | -0.07 (-0.16 to 0.01)           | 0.0042                  |
| Ultra-processed food (Group 4)     | 0.13 (0.05 to 0.22)                         | 0.17 (0.10 to 0.25)             | 0.07 (-0.01 to 0.15)            | 0.59                    |
| Mediterranean Diet Score           | -0.07 (-0.14 to 0.002)                      | -0.12 (-0.19 to -0.05)          | -0.03 (-0.12 to 0.05)           | 0.37                    |
| FSAm-NPS dietary index             | 0.07 (-0.01 to 0.15)                        | 0.14 (0.06 to 0.22)             | 0.09 (0.004 to 0.18)            | 0.40                    |

Regression coefficients with 95% confidence intervals obtained from a multivariable-adjusted linear regression including age, sex, energy intake, place of residence, educational level, occupation, marital status, smoking status, sport activity, body mass index, history of cardiovascular disease, history of cancer, diabetes, hyperlipidaemia and hypertension.

FSAm-NPS = Food Standards Agency Nutrient Profiling System.

Each dietary variable was standardized to allow comparison.

**Table S2.** Association of food processing according to NOVA classification with meal timing pattern in men and women from the INHES Study, Italy 2010–2013.

| NOVA groups                        | Meal timing pattern (Late vs. early eaters) |                          | P value<br>for interaction |
|------------------------------------|---------------------------------------------|--------------------------|----------------------------|
|                                    | Men<br>(n=4053; 46.6%)                      | Women<br>(n=4635; 53.4%) |                            |
|                                    | $\beta$ (95%CI)                             | $\beta$ (95%CI)          |                            |
| Minimally processed food (Group 1) | -0.08 (-0.15 to -0.01)                      | -0.13 (-0.18 to -0.08)   | 0.045                      |
| Culinary ingredients (Group 2)     | -0.01 (-0.08 to 0.06)                       | 0.10 (0.03 to 0.16)      | 0.0016                     |
| Processed food (Group 3)           | 0.02 (-0.05 to 0.09)                        | 0.03 (-0.02 to 0.08)     | 0.29                       |
| Ultra-processed food (Group 4)     | 0.11 (0.04 to 0.18)                         | 0.15 (0.09 to 0.22)      | 0.25                       |
| Mediterranean Diet Score           | -0.07 (-0.13 to -0.01)                      | -0.08 (-0.14 to -0.02)   | 0.71                       |
| FSAm-NPS dietary index             | 0.10 (0.03 to 0.16)                         | 0.10 (0.03 to 0.16)      | 0.96                       |

Regression coefficients with 95% confidence intervals obtained from a multivariable-adjusted linear regression including age, energy intake, place of residence, educational level, occupation, marital status, smoking status, sport activity, body mass index, history of cardiovascular disease, history of cancer, diabetes, hyperlipidaemia and hypertension.

FSAm-NPS = Food Standards Agency Nutrient Profiling System.

Each dietary variable was standardized to allow comparison.
